# Supplementary material for: All-conjugated poly(3-alkylthiophene) diblock copolymer-based bulk heterojunction solar cells with controlled molecular organization and nanoscale morphology
Source: Royal Society of Chemistry journal article supplement (doi:10.1039/c1ee01509e), 2011-01-01
Supplement: c1ee01509e.pdf [file c1ee01509e.pdf]

## **Supporting Information**

# All-Conjugated Poly(3-alkylthiophene) Diblock Copolymer-Based Bulk Heterojunction Solar Cells with Controlled Molecular Organization and Nanoscale Morphology

*Ming He, Wei Han, Jing Ge, Yuliang Yang, Feng Qiu,\* and Zhiqun Lin\**

**Fig. S1**

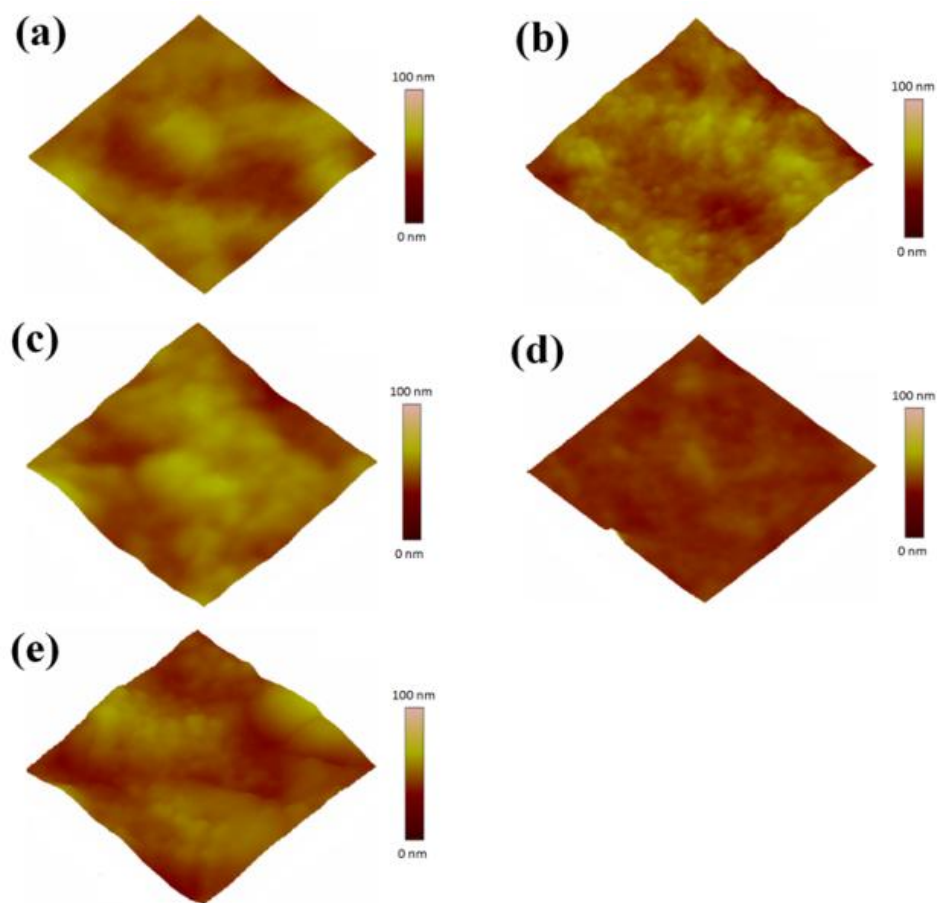

**Fig. S1** AFM height images of blend films yielded by following the fabrication procedures of the photovoltaic devices, but without depositing the Ca/Al layers on the top. (a) P3BT/PC<sub>71</sub>BM with a root mean square (rms) roughness of 2.9 nm; (b) P3BHT21/PC<sub>71</sub>BM with a rms roughness of 8.8 nm; (c) P3BHT11/PC<sub>71</sub>BM with a rms roughness of 8.0 nm; (d) P3BHT12/PC<sub>71</sub>BM with a rms roughness of 2.0 nm; and (e) P3HT/PC<sub>71</sub>BM with a rms roughness of 8.9 nm. The scanning size =  $1 \times 1 \mu\text{m}^2$  for all images.

**Table S1.**

**Table S1.** Summary of parameters extracted from the  $J$ - $V$  curves of P3BT/PC<sub>71</sub>BM, P3BHT/PC<sub>71</sub>BM, and P3HT/PC<sub>71</sub>BM space-charge limited current (SCLC) devices according to the Mott-Gurney equation.

| P3BHT:PC <sub>71</sub> BM | $\mu$<br>(cm <sup>2</sup> V <sup>-1</sup> s <sup>-1</sup> ) | $\beta$               |
|---------------------------|-------------------------------------------------------------|-----------------------|
| P3BT                      | $3.8 \times 10^{-6}$                                        | $-8.4 \times 10^{-4}$ |
| P3BHT21                   | $2.0 \times 10^{-4}$                                        | $-4.2 \times 10^{-4}$ |
| P3BHT11                   | $5.3 \times 10^{-6}$                                        | $-6.5 \times 10^{-4}$ |
| P3BHT12                   | $2.3 \times 10^{-6}$                                        | $-5.8 \times 10^{-4}$ |
| P3HT                      | $4.2 \times 10^{-5}$                                        | $-4.6 \times 10^{-4}$ |
